# Supplementary material for: Ultra-Narrowband Helical Emitter with Frontier Orbital Confinement for Stable Deep-Blue Hybrid-Tandem Organic Light-emitting Diodes
Source: Research Square preprint supplement (doi:10.21203/rs.3.rs-7669597/v1), 2025-10-03
Supplement: Supplementary file 1 [file 615f0fcdf7ab981cca085385.pdf]

## Supplementary Information

### Ultra-Narrowband Helical Emitter with Frontier Orbital Confinement for Stable Deep-Blue Hybrid-Tandem Organic Light-emitting Diodes

Chuanqin Cheng<sup>#1</sup>, Minqiang Mai<sup>#1</sup>, Chenglong Li<sup>1</sup>, Dongdong Zhang<sup>\*1</sup>, and Lian Duan<sup>\*1,2</sup>.

<sup>1</sup>Key Laboratory of Organic Optoelectronics and Molecular Engineering of Ministry of Education, Department of Chemistry, Tsinghua University, Beijing, 100084, China.

<sup>2</sup> Laboratory of Flexible Electronics Technology, Tsinghua University, Beijing, 100084, China.

<sup>#</sup>These authors contribute equally to this work.

Dongdong Zhang, ddzhang@mail.tsinghua.edu.cn;

Lian Duan, duanl@mail.tsinghua.edu.cn

## **Table of Contents**

|                                                 |    |
|-------------------------------------------------|----|
| Synthetic procedures and Characterization ----- | 3  |
| Optical simulations of OLED devices -----       | 7  |
| Supplementary Figures and Tables-----           | 10 |
| References-----                                 | 40 |

## Synthetic procedures and characterization

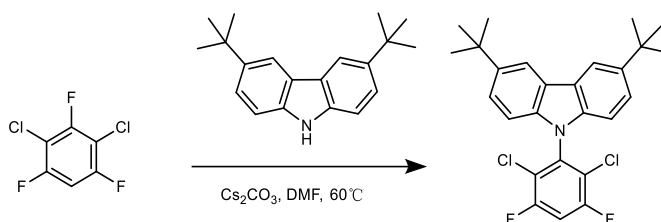

**Synthesis of 3,6-di-tert-butyl-9-(2,6-dichloro-3,5-difluorophenyl)-9H-carbazole (1):** Under a nitrogen atmosphere, 2,4-dichloro-1,3,5-trifluorobenzene (5 g, 24.9 mmol), 3,6-di-tert-butyl-9H-carbazole (6.9 g, 24.9 mmol), and  $\text{Cs}_2\text{CO}_3$  (12.1 g, 37.4 mmol) were dissolved in dry N,N-dimethylformamide (100 mL). The reaction mixture was stirred at 60 °C for 12 hours. After cooling to room temperature, the reaction mixture was poured into water. After filtration, the crude product was purified by the silica gel column using petroleum ether as an eluent to give the pure product as a white powder (8.6 g, yielding 75%).  $^1\text{H}$  NMR (400 MHz,  $\text{CDCl}_3$ ):  $\delta$  8.14-8.16 (m, 2H, Ar), 7.43-7.47 (m, 2H, Ar), 7.28 (t,  $J = 8.0$  Hz, 1H, Ar), 6.86-6.89 (m, 2H, Ar), 1.46 (s, 18H,  $-\text{CH}_3$ ).  $^{13}\text{C}$  NMR (101 MHz,  $\text{CDCl}_3$ ):  $\delta$  158.4, 155.8, 143.6, 137.9, 136.0, 123.9, 123.6, 116.6, 109.0, 106.0, 34.8, 32.0.

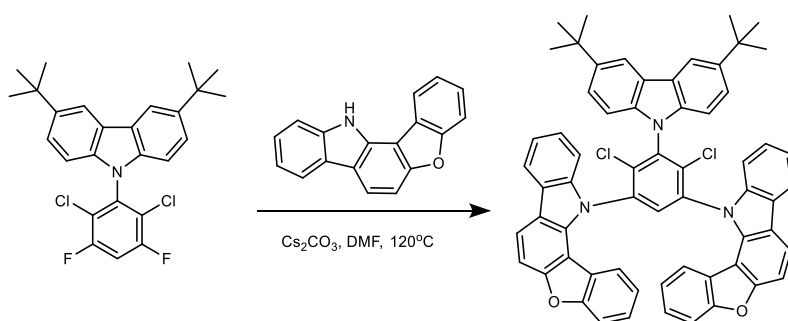

**Synthesis of 12,12'-(4,6-dichloro-5-(3,6-di-tert-butyl-9H-carbazol-9-yl)-1,3-phenylene)bis(12H-benzofuro[3,2-a]carbazole) (2):** Under a nitrogen atmosphere, intermediate **1** (2 g, 4.3 mmol), 12H-benzofuro[3,2-a]carbazole (2.3 g, 9.1 mmol), and  $\text{Cs}_2\text{CO}_3$  (4.2 g, 13.0 mmol) were dissolved in dry N,N-dimethylformamide (30 mL). The reaction mixture was stirred at 120 °C for 24 hours. After cooling to room temperature, the reaction mixture was poured into water. After filtration, the crude product was purified by the silica gel column using petroleum ether/dichloromethane (2:1 v/v) as an eluent to give the pure product as a white powder (2.6 g, yielding 63%).  $^1\text{H}$  NMR (400 MHz,  $\text{CDCl}_3$ ):  $\delta$  8.12-8.16 (m, 4H, Ar), 8.04-8.07 (m, 4H, Ar), 7.71-7.73 (m, 2H, Ar), 7.61-7.65 (m, 2H, Ar), 7.51-7.56 (m, 4H, Ar), 7.36-7.39 (m, 2H, Ar), 7.27-7.32 (m, 3H, Ar), 7.21-7.23 (m, 2H, Ar), 7.12 (d,  $J = 8.0$  Hz, 2H, Ar), 6.83 (d,  $J = 8.0$

Hz, 2H, Ar), 1.43 (s, 18H, -CH<sub>3</sub>). <sup>13</sup>C NMR (101 MHz, CDCl<sub>3</sub>): δ 156.70, 156.10, 143.76, 141.27, 139.22, 138.82, 138.06, 134.07, 126.72, 125.57, 124.47, 124.08, 123.82, 122.90, 122.66, 121.92, 121.61, 119.97, 119.85, 119.77, 116.91, 112.24, 110.45, 109.11, 108.95, 105.83, 34.84, 32.05.

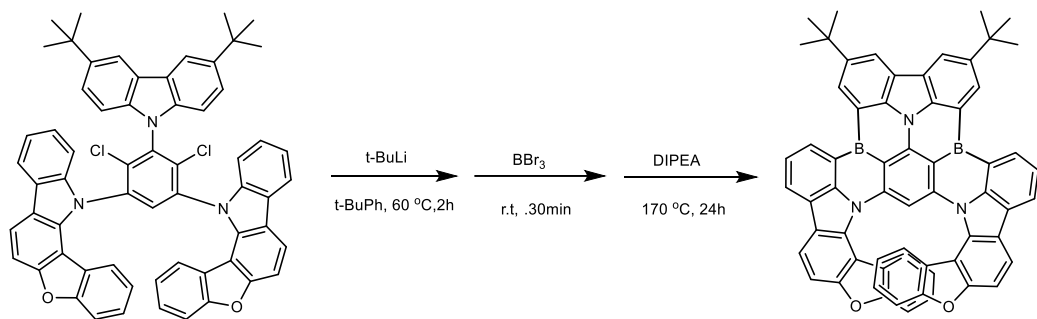

**Synthesis of BD-Cz-2CzO:** Under a nitrogen atmosphere, a solution of t-BuLi in pentane (7.4 mL, 1.3 M) was slowly added to a solution of intermediate **2** (2 g, 2.1 mmol) in tert-butyl benzene (50 mL) at -78 °C. After stirring for 2 hours at 60 °C, boron tribromide (1 mL) was added at -78 °C, and the reaction mixture was stirred at room temperature for 2 hours. N,N-Diisopropylethylamine (2.9 mL) was added at 0 °C, and then the reaction mixture was allowed to warm to room temperature. After stirring for 24 hours at 170 °C, the reaction mixture was cooled to room temperature. The reaction mixture was quenched with ethanol and concentrated under reduced pressure. The crude product BD-Cz-2CzO was purified by column chromatography on silica gel (petroleum ether/dichloromethane = 2:1 v/v) and recrystallized from dichloromethane and methanol. The yield was 0.53 g, representing a 28% yield. <sup>1</sup>H NMR (400 MHz, CD<sub>2</sub>Cl<sub>2</sub>): δ 9.15 (s, 2H, Ar), 8.98 (d, *J* = 8.0 Hz, 2H, Ar), 8.78 (s, 2H, Ar), 8.41 (d, *J* = 8.0 Hz, 2H, Ar), 8.16 (d, *J* = 8.0 Hz, 2H, Ar), 7.80-7.87 (m, 3H, Ar), 7.39 (d, *J* = 8.0 Hz, 2H, Ar), 7.24 (d, *J* = 8.0 Hz, 2H, Ar), 6.75 (t, *J* = 8.0 Hz, 2H, Ar), 6.66 (d, *J* = 8.0 Hz, 2H, Ar), 5.98 (t, *J* = 8.0 Hz, 2H, Ar), 1.79 (s, 18H, -CH<sub>3</sub>). The <sup>13</sup>C spectrum could not be obtained due to the poor solubility.

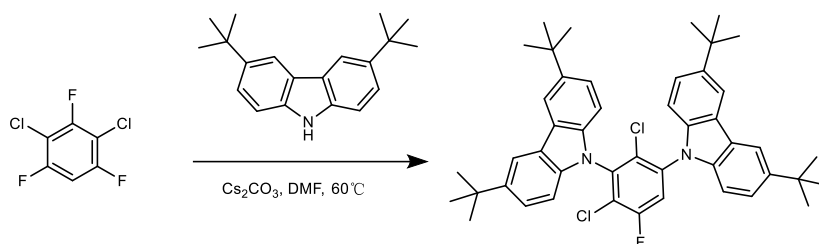

**Synthesis of 9,9'-(2,4-dichloro-3,5-bis(3,6-di-tert-butyl-9H-carbazole) (3):** Under a nitrogen atmosphere, 2,4-dichloro-1,3,5-trifluorobenzene (3 g, 14.9 mmol), 3,6-di-tert-butyl-9H-carbazole (8.3 g, 29.8 mmol), and  $\text{Cs}_2\text{CO}_3$  (14.6 g, 44.7 mmol) were dissolved in dry N,N-dimethylformamide (50 mL). The reaction mixture was stirred at 60 °C for 12 hours. After cooling to room temperature, the reaction mixture was poured into water. After filtration, the crude product was purified by the silica gel column using petroleum ether as an eluent to give the pure product as a white powder (7.3 g, yielding 68 %).  $^1\text{H}$  NMR (400 MHz,  $\text{CDCl}_3$ ):  $\delta$  8.13-8.16 (m, 4H, Ar), 7.56 (d,  $J$  = 8.0 Hz, 1H, Ar), 7.49-7.58 (m, 4H, Ar), 7.12 (d,  $J$  = 8.0 Hz, 2H, Ar), 7.01 (d,  $J$  = 8.0 Hz, 2H, Ar), 1.47 (s, 18H,  $-\text{CH}_3$ ), 1.46 (s, 18H,  $-\text{CH}_3$ ).  $^{13}\text{C}$  NMR (101 MHz,  $\text{CDCl}_3$ ):  $\delta$  143.85, 143.63, 138.85, 138.05, 124.09, 124.07, 123.84, 123.68, 118.26, 116.78, 116.67, 109.35, 109.00, 34.87, 32.09, 32.05.

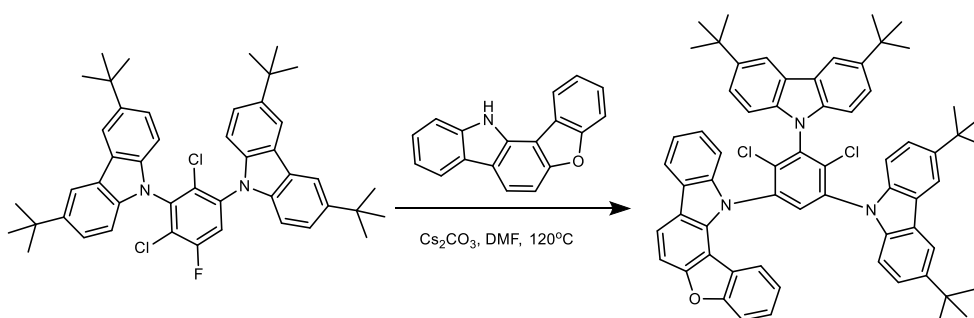

**Synthesis of 12-(2,4-dichloro-3,5-bis(3,6-di-tert-butyl-9H-carbazol-9-yl)phenyl)-12H-benzofuro[3,2-a]carbazole (4):** Under a nitrogen atmosphere, intermediate **3** (2 g, 2.7 mmol), 12H-benzofuro[3,2-a]carbazole (0.8 g, 3.1 mmol), and  $\text{Cs}_2\text{CO}_3$  (1.4 g, 4.2 mmol) were dissolved in dry N,N-dimethylformamide (30 mL). The reaction mixture was stirred at 120 °C for 24 hours. After cooling to room temperature, the reaction mixture was poured into water. After filtration, the crude product was purified by the silica gel column using petroleum ether/dichloromethane (4:1 v/v) as an eluent to give the pure product as a white powder (1.8 g, yielding 68%).  $^1\text{H}$  NMR (400 MHz,  $\text{CDCl}_3$ ):  $\delta$  8.14-8.24 (m, 4H, Ar), 8.07-8.10 (m, 2H, Ar), 8.01 (s, 1H, Ar), 7.72-7.78 (m, 1H, Ar), 7.49-7.75 (m, 6H, Ar), 7.38-7.44 (m, 2H, Ar), 7.27-7.30 (m, 2H, Ar), 7.14-7.21 (m, 3H, Ar), 7.04 (d,  $J$  = 8.0 Hz, 1H, Ar), 6.77 (d,  $J$  = 8.0 Hz, 1H, Ar), 1.50

(s, 9H, -CH<sub>3</sub>), 1.45 (s, 18H, -CH<sub>3</sub>), 1.41 (s, 18H, -CH<sub>3</sub>). <sup>13</sup>C NMR (101 MHz, CDCl<sub>3</sub>) : δ 156.74, 156.12, 143.90, 143.81, 143.73, 143.64, 141.07, 138.90, 138.79, 138.28, 138.09, 137.92, 137.59, 137.12, 136.95, 133.20, 126.72, 125.73, 124.39, 124.20, 124.10, 124.01, 123.92, 123.85, 123.70, 122.95, 122.76, 121.83, 121.52, 119.88, 119.71, 116.91, 116.71, 116.62, 112.18, 109.88, 109.26, 109.18, 108.97, 108.67, 105.65, 34.88, 34.83, 34.76, 32.07, 32.03, 32.00, 31.95.

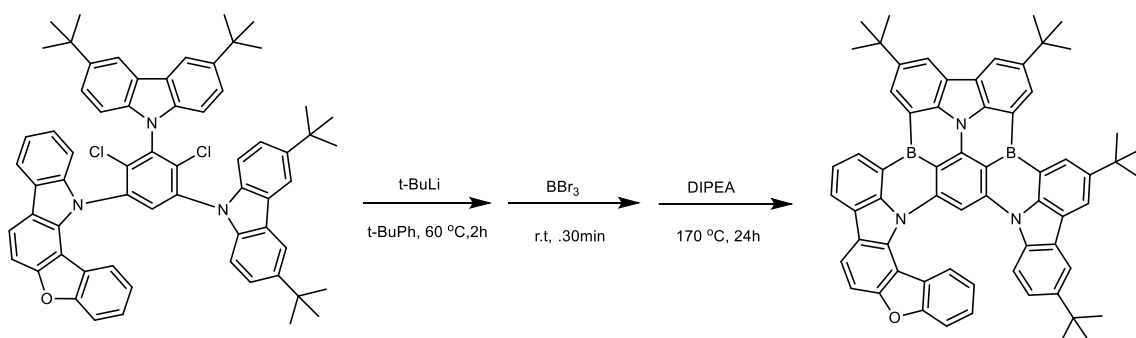

**Synthesis of BD-2Cz-CzO:** Under a nitrogen atmosphere, a solution of t-BuLi in pentane (5.4 mL, 1.3 M) was slowly added to a solution of intermediate **4** (1.5 g, 1.6 mmol) in tert-butyl benzene (50 mL) at -78 °C. After stirring for 2 hours at 60 °C, boron tribromide (0.7 mL) was added at -78 °C, and the reaction mixture was stirred at room temperature for 2 hours. N,N-Diisopropylethylamine (2.1 mL) was added at 0 °C, and then the reaction mixture was allowed to warm to room temperature. After stirring for 24 hours at 170 °C, the reaction mixture was cooled to room temperature. The reaction mixture was quenched with ethanol and concentrated under reduced pressure. The crude product BD-2Cz-CzO was purified by column chromatography on silica gel (petroleum ether/dichloromethane = 3:1 v/v) and recrystallized from dichloromethane and methanol. The yield was 0.43 g, representing a 31% yield. <sup>1</sup>H NMR (400 MHz, CD<sub>2</sub>Cl<sub>2</sub>): δ 9.07 (m, 2H, Ar), 8.54-8.60 (m, 2H, Ar), 8.43 (s, 2H, Ar), 8.25 (d, *J* = 8.0 Hz, 1H, Ar), 8.02-8.08 (m, 2H, Ar), 7.87-7.94 (m, 2H, Ar), 7.55 (t, *J* = 8.0 Hz, 1H, Ar), 7.44 (d, *J* = 8.0 Hz, 1H, Ar), 7.36 (d, *J* = 8.0 Hz, 1H, Ar), 6.90 (d, *J* = 4.0 Hz, 1H, Ar), 6.63-6.70 (m, 2H, Ar), 6.53-6.57 (m, 1H, Ar), 6.11 (t, *J* = 8.0 Hz, 1H, Ar), 1.83 (s, 18H, -CH<sub>3</sub>), 1.80 (s, 18H, -CH<sub>3</sub>), 1.72 (s, 18H, -CH<sub>3</sub>), 1.52 (s, 18H, -CH<sub>3</sub>).

## Optical simulations of OLED devices

To characterize the properties of OLED device, a theoretical model based on the classical dipole and microcavity theory is utilized<sup>1,2</sup>.

For isotropic dipole orientation, the total spectral power density  $K$  per unit normalized in-plane wave vector can be represented as below<sup>3-7</sup>

$$K = \text{Re} \left\{ \frac{u^2}{4\sqrt{1-u^2}} \left[ \frac{(1+a_+^{\text{TM}})(1+a_-^{\text{TM}})}{(1+a^{\text{TM}})} + \frac{(1-u^2)}{u^2} \frac{(1-a_+^{\text{TM}})(1-a_-^{\text{TM}})}{(1-a^{\text{TM}})} + \frac{(1+a_+^{\text{TE}})(1+a_-^{\text{TE}})}{u^2(1-a^{\text{TE}})} \right] \right\} \quad (1)$$

Here  $\text{Re}\{\dots\}$  denotes the real part of the complex quantity enclosed by brackets, and the normalized in-plane wave vector  $u = k_\rho / k_e = \sin \theta$ , where  $k_e$  stands for the total wavevector of emission layer, and  $k_\rho$  is the projection of  $k_e$  in the dipole plane.

In addition, the coefficient  $a$  and  $a_{+(-)}$  are defined as the following

$$a_{+(-)}^{\text{TE(TM)}} = r_{+(-)}^{\text{TE(TM)}} \exp(2jk_{z,e}z_{+(-)}) \quad (2)$$

$$a^{\text{TE(TM)}} = r_+^{\text{TE(TM)}} r_-^{\text{TE(TM)}} \exp(2jk_{z,e}d_e) \quad (3)$$

In Eqs.(2)-(3), we have the wavevector  $k_{z,e} = k_e \sqrt{1-u^2} = 2\pi n_e \sqrt{1-u^2} / \lambda$ , where  $\lambda$  and  $n_e$  denote the wavelength and the refractive index of emission layer, respectively. Furthermore,  $z_{+(-)}$  is the distance of the dipole from the right (left) interface of the emission layer, and  $r_+^{\text{TE(TM)}} (r_-^{\text{TE(TM}})$  stands for the reflection coefficient for waves traveling from the dipole layer to the right-side(left-side), and can be obtained from the below

$$r_-^{\text{TE(TM)}} = -\frac{S_{12}^{-,\text{TE(TM)}}}{S_{11}^{-,\text{TE(TM)}}} \quad (4)$$

$$r_+^{\text{TE(TM)}} = -\frac{S_{21}^{+,\text{TE(TM)}}}{S_{11}^{+,\text{TE(TM)}}} \quad (5)$$

Based on transfer matrix approach<sup>8</sup>,  $S^{-(+)}$  can be obtained from the 2x2 matrix defined as below:

$$S^- = I^{0/1} L^1(d_1) \dots I^{q-1/j} L^q(z_e) = \begin{bmatrix} S_{11}^{-,\text{TE(TM)}} & S_{12}^{-,\text{TE(TM)}} \\ S_{21}^{-,\text{TE(TM)}} & S_{22}^{-,\text{TE(TM)}} \end{bmatrix} \quad (6)$$

$$S^+ = I^{q/q+1} L^{q+1} (d_{q+1}) \dots I^{m-1/m} L^m (d_m) I^{m/m+1} = \begin{bmatrix} S_{11}^{+, \text{TE(TM)}} & S_{12}^{+, \text{TE(TM)}} \\ S_{21}^{+, \text{TE(TM)}} & S_{22}^{+, \text{TE(TM)}} \end{bmatrix} \quad (7)$$

The dipole is located at the  $q$ -th layer. The interface matrix ( $I$ ) and the layer matrix ( $L$ ) in Eqs(6)-(7) are defined as the following

$$I^{j/j+1} = \frac{1}{t_{j/(j+1)}^{\text{TE(TM)}}} \begin{bmatrix} 1 & r_{j/(j+1)}^{\text{TE(TM)}} \\ r_{j/(j+1)}^{\text{TE(TM)}} & 1 \end{bmatrix} \quad (8)$$

$$L^j = \begin{bmatrix} \exp(-ik_{z,j}d_j) & 0 \\ 0 & \exp(ik_{z,j}d_j) \end{bmatrix} \quad (9)$$

In Eq.(9), we have the wavevector  $k_{z,e} = k_e \sqrt{1-u^2} = 2\pi n_e \sqrt{1-u^2} / \lambda$ . The coefficient  $r_{j/(j+1)}^{\text{TE(TM)}}$  and  $t_{j/(j+1)}^{\text{TE(TM)}}$  of Eq.(8) refer to the complex Fresnel reflection and transmission coefficients at the interface from the  $j$ -th to  $(j+1)$ -th layers. These coefficients are expressed as below

$$r_{j/(j+1)}^{\text{TE}} = \frac{\sqrt{\tilde{n}_j^2 - n_e^2 u^2} - \sqrt{\tilde{n}_{j+1}^2 - n_e^2 u^2}}{\sqrt{\tilde{n}_j^2 - n_e^2 u^2} + \sqrt{\tilde{n}_{j+1}^2 - n_e^2 u^2}}, \quad r_{j/(j+1)}^{\text{TM}} = \frac{\sqrt{\tilde{n}_j^2 - n_e^2 u^2} / \tilde{n}_j - \sqrt{\tilde{n}_{j+1}^2 - n_e^2 u^2} / \tilde{n}_{j+1}}{\sqrt{\tilde{n}_j^2 - n_e^2 u^2} / \tilde{n}_j + \sqrt{\tilde{n}_{j+1}^2 - n_e^2 u^2} / \tilde{n}_{j+1}},$$

$$t_{j/(j+1)}^{\text{TE}} = \frac{2\sqrt{\tilde{n}_j^2 - n_e^2 u^2}}{\sqrt{\tilde{n}_j^2 - n_e^2 u^2} + \sqrt{\tilde{n}_{j+1}^2 - n_e^2 u^2}},$$

$$t_{j/(j+1)}^{\text{TM}} = \frac{2\sqrt{\tilde{n}_j^2 - n_e^2 u^2}}{\tilde{n}_{j+1}\sqrt{\tilde{n}_j^2 - n_e^2 u^2} / \tilde{n}_j + \tilde{n}_j\sqrt{\tilde{n}_{j+1}^2 - n_e^2 u^2} / \tilde{n}_{j+1}}$$

Here  $\tilde{n}_j$  denotes the complex refractive index of the  $j$ -th layer.

The total radiated power  $F$  at the dipole location, can be obtained by integrating  $K$  with respect to  $u^2$  as expressed below

$$F = \int_0^\infty K du^2 = 2 \int_0^\infty u K du \quad (10)$$

where the  $uK$  is the power dissipation spectra that can be utilized to calculate the mode contributions according to different region of  $u$ . The regions  $0 \leq u \leq n_0 / n_e$ ,  $n_0 / n_e \leq u \leq n_s / n_e$ ,  $n_s / n_e \leq u \leq 1$ , and  $u > 1$  are corresponding to air, substrate, waveguide, and surface plasmonic polariton modes, respectively <sup>4</sup>.



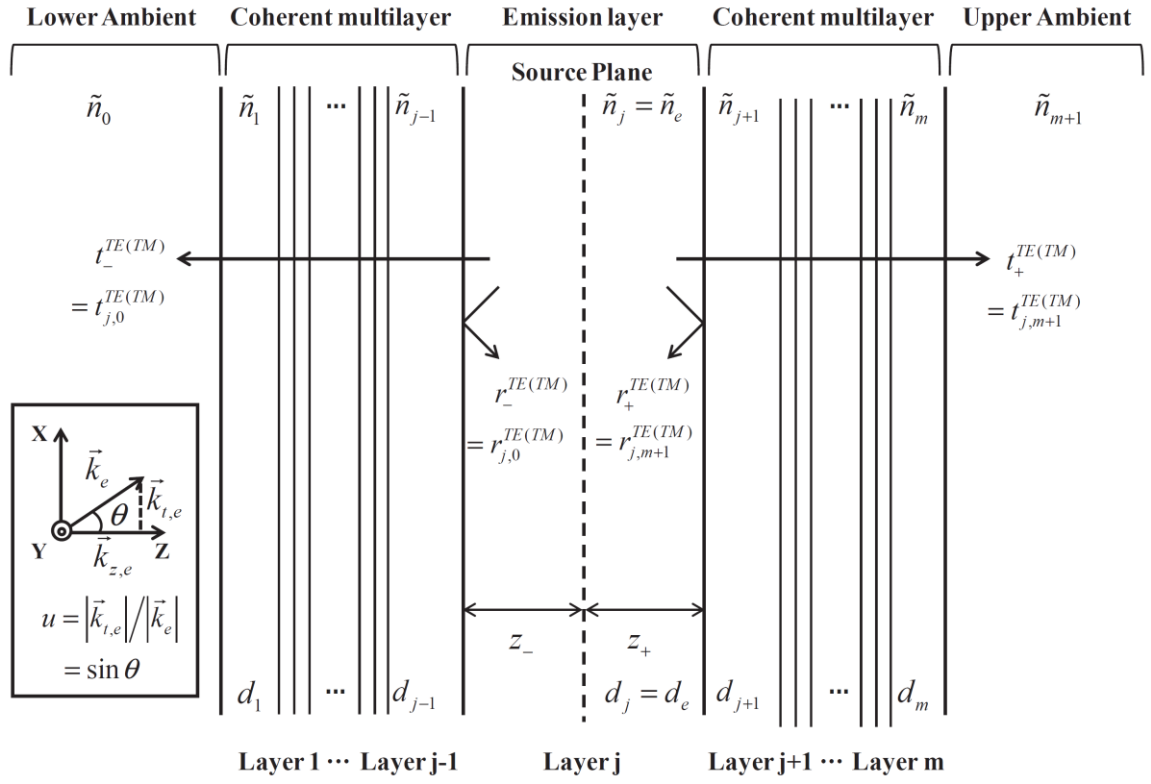

Scheme.1. Schematic diagram of the OLED made up of coherent multilayers enclosed with semi-infinite ambient layers.<sup>5</sup>

## Supplementary Figures and Tables

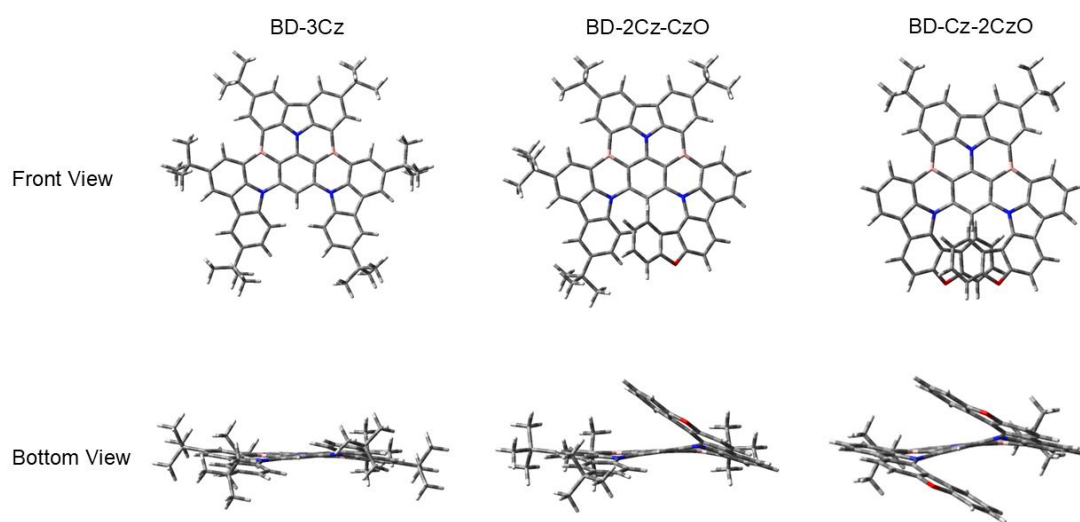

**Supplementary Fig. 1** Optimized structures of BD-3Cz, BD-2Cz-CzO and BD-Cz-2CzO.

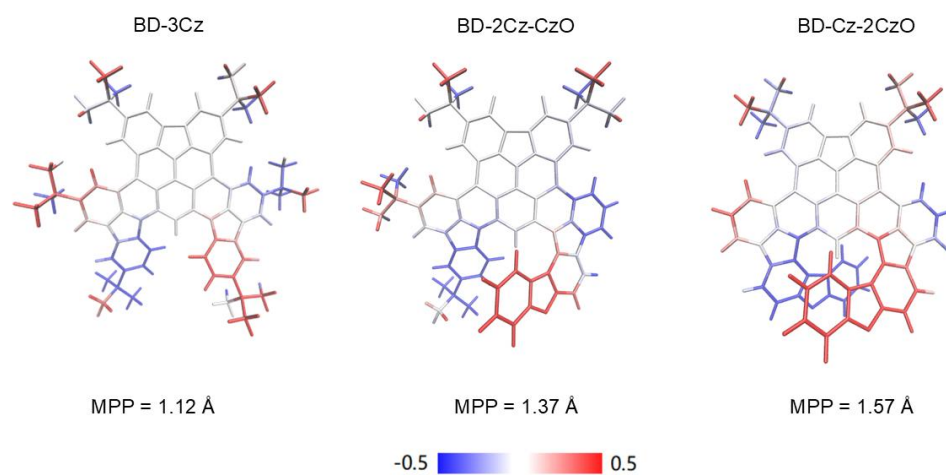

**Supplementary Fig. 2** The molecular planarity parameter (MPP) values of BD-3Cz, BD-2Cz-CzO and BD-Cz-2CzO.

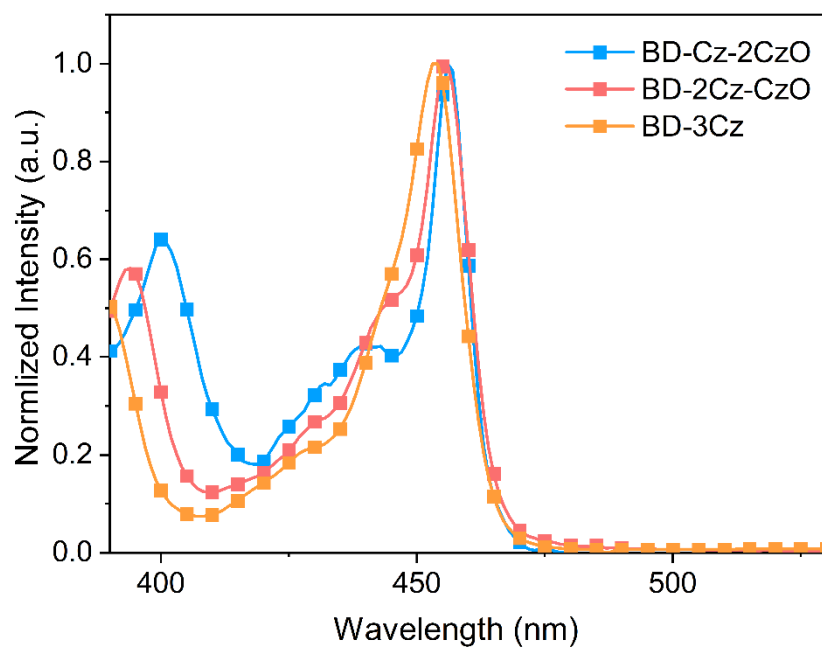

**Supplementary Fig. 3** UV-vis absorption spectra at room temperature of BD-3Cz, BD-2Cz-CzO, and BD-Cz-2CzO in dilute toluene solution.

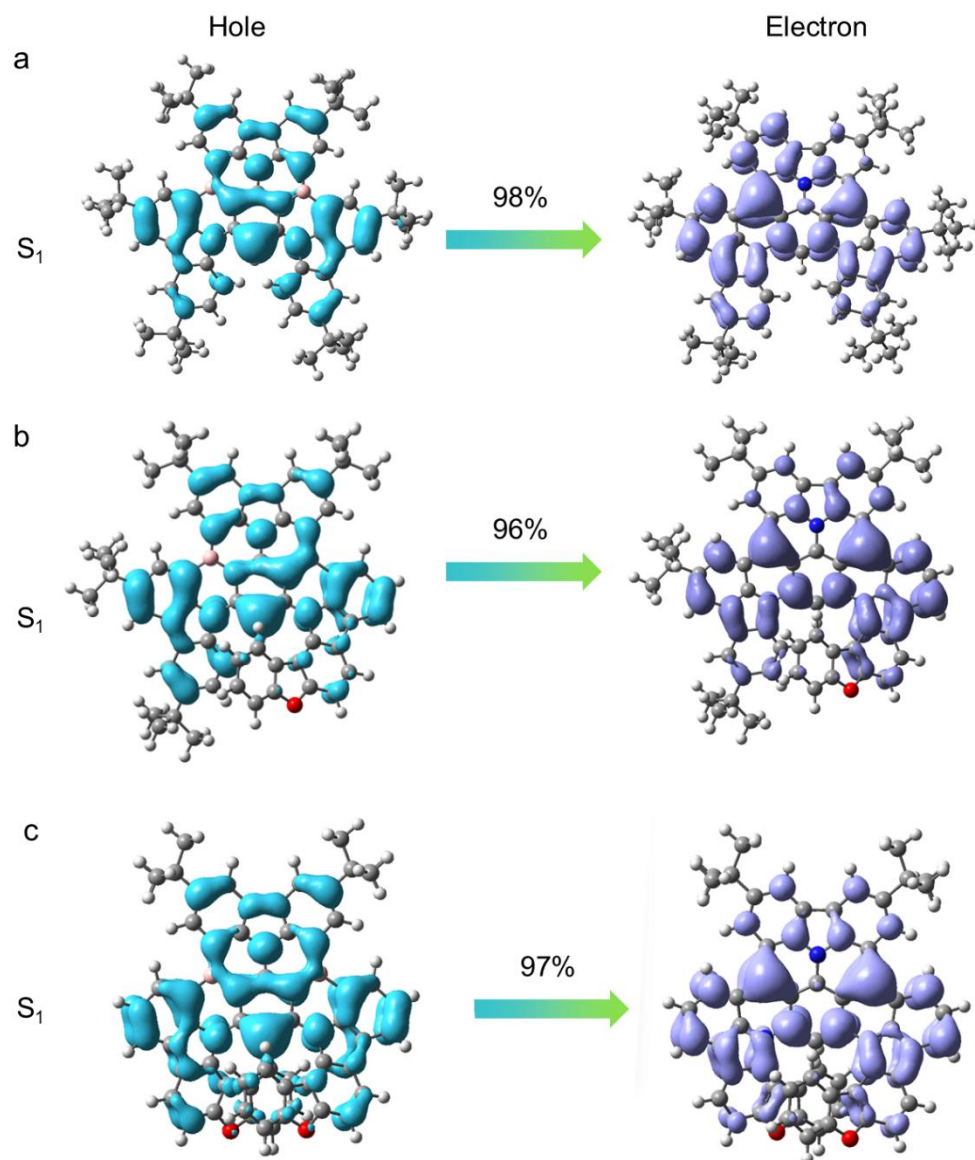

**Supplementary Fig. 4** Hole-electron analysis describing the excitation characters of the  $S_1$  in BD-3Cz (a), BD-2Cz-CzO (b), and BD-Cz-2CzO (c).

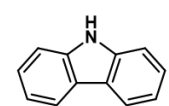

**Carbazole**

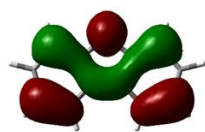

**-5.46 eV**

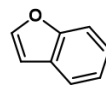

**Benzofuran -5.98 eV**

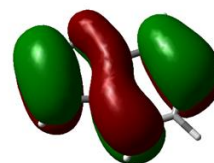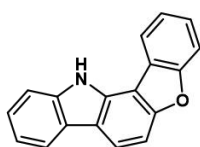

**CzO**

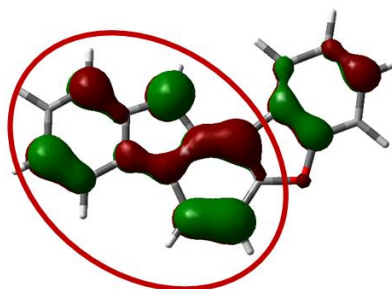

**-5.44 eV**

**Distribution of 82.17%**

**Supplementary Fig. 5** Frontier molecular orbital distributions of carbazole, benzofuran and CzO.

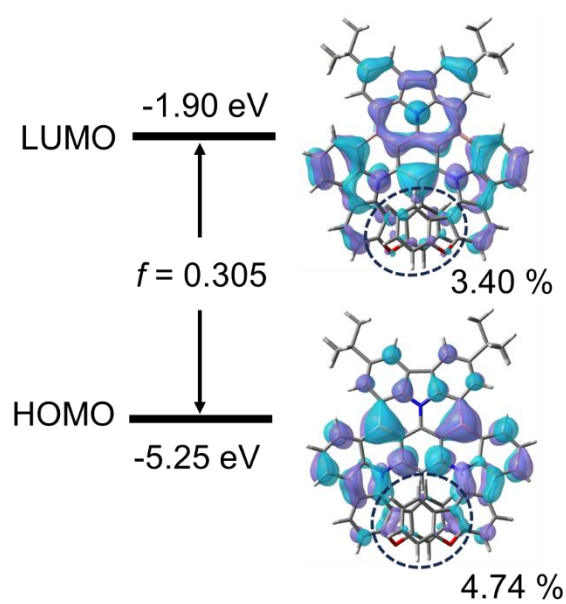

**Supplementary Fig. 6** The contribution of benzofuran part to the HOMO and LUMO distribution of the whole molecule of BD-Cz-2CzO.

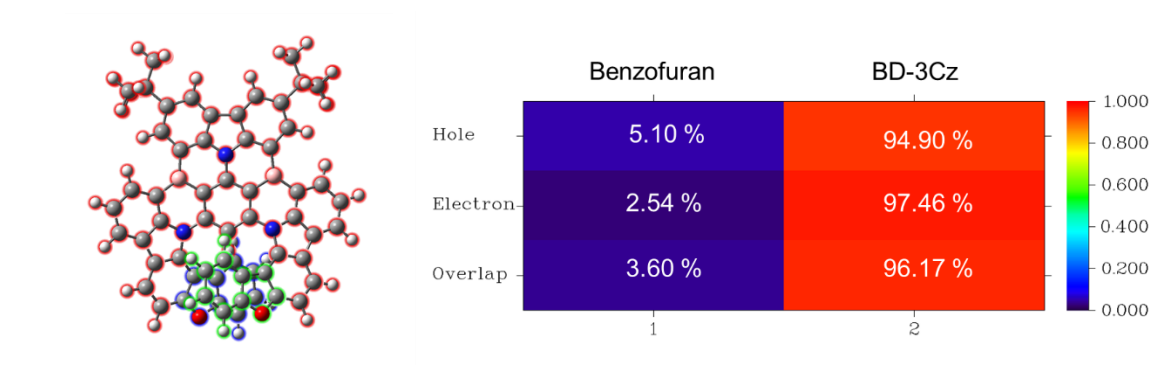

**Supplementary Fig. 7** The heat map of the contribution of the benzofuran segment to the distribution of holes and electrons during the charge transfer excitation process.



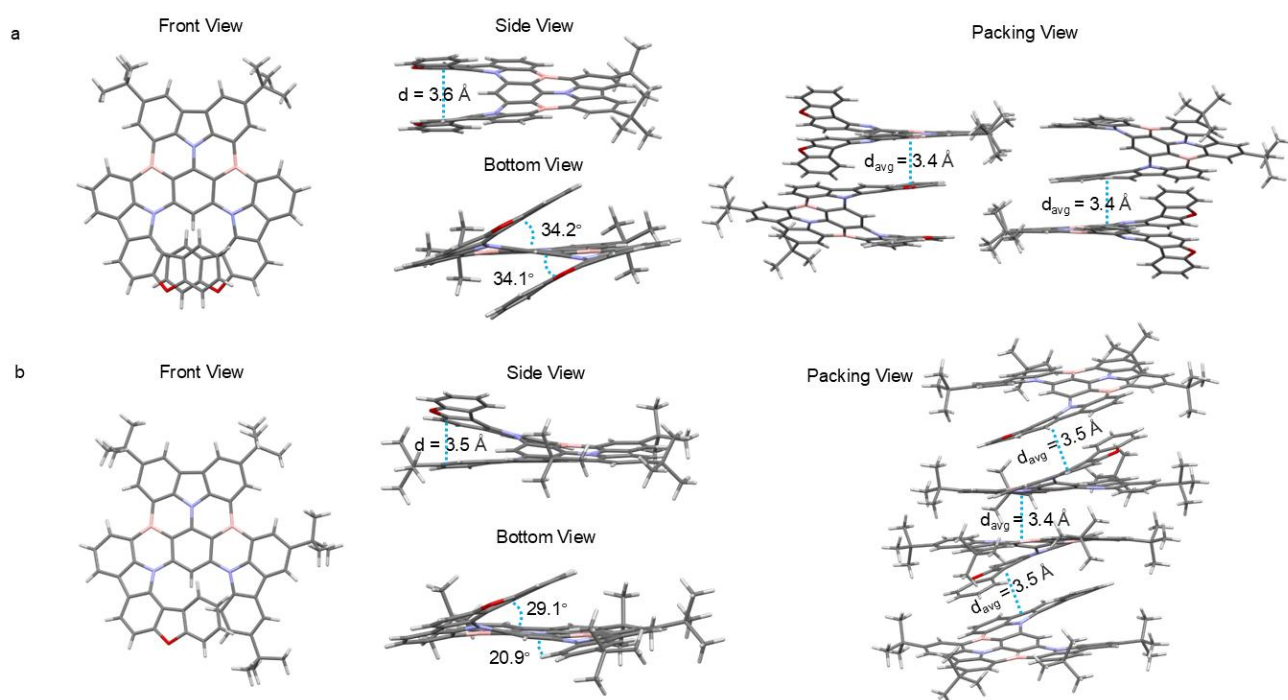

**Supplementary Fig. 8** Single-crystal X-ray diffraction molecular structures of BD-Cz-2CzO (a) and BD-2Cz-CzO (b).

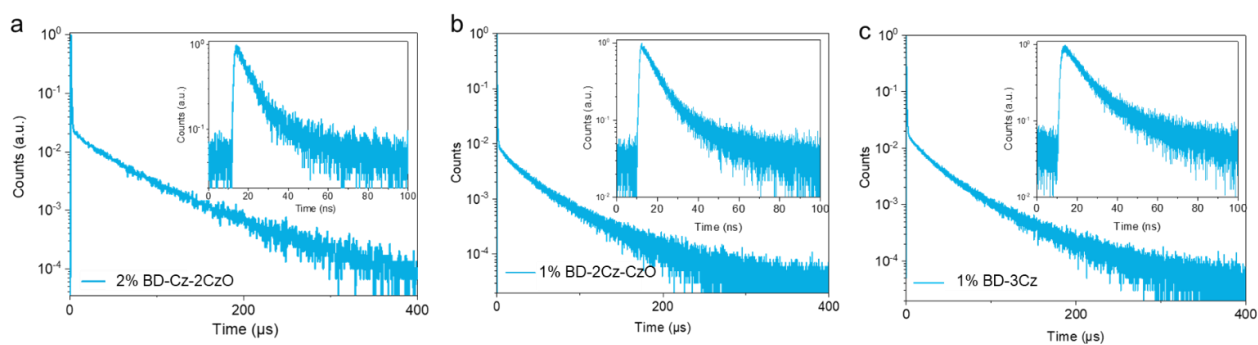

**Supplementary Fig. 9** Transient PL decay curves of BD-Cz-2CzO (a), BD-2Cz-CzO (b), and BD-3Cz (c) doped films.

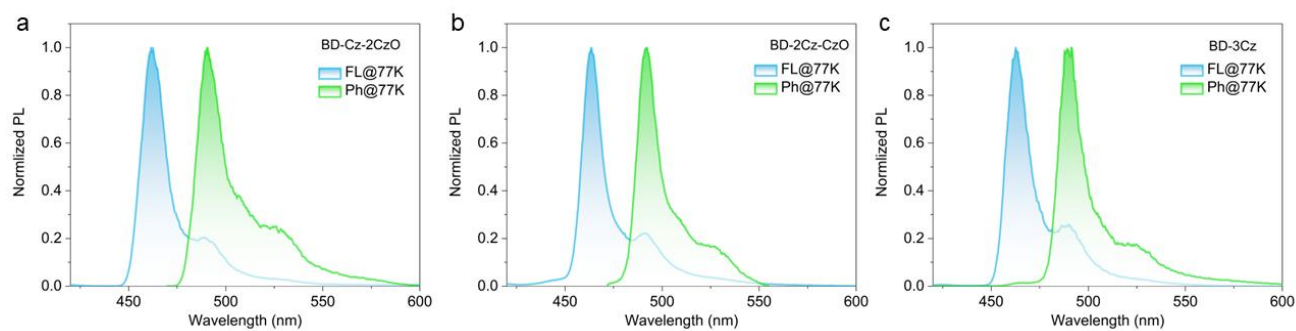

**Supplementary Fig. 10** Fluorescence (77 K) and phosphorescent (77 K) spectra of BD-Cz-2CzO (a), BD-2Cz-CzO (b), and BD-3Cz (c) in dilute toluene solution.

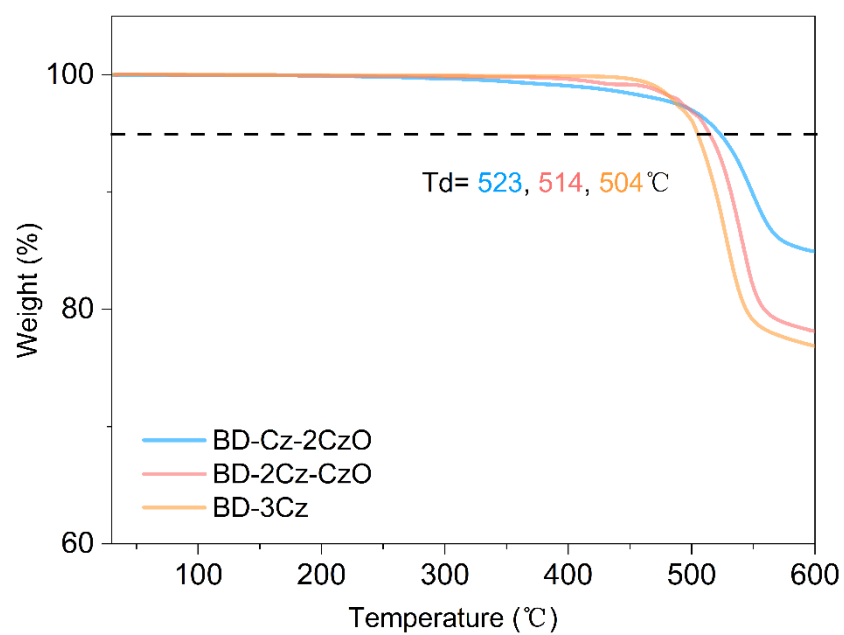

**Supplementary Fig. 11** TGA thermogram of BD-Cz-2CzO at a heating rate of 10 °C min<sup>-1</sup>.

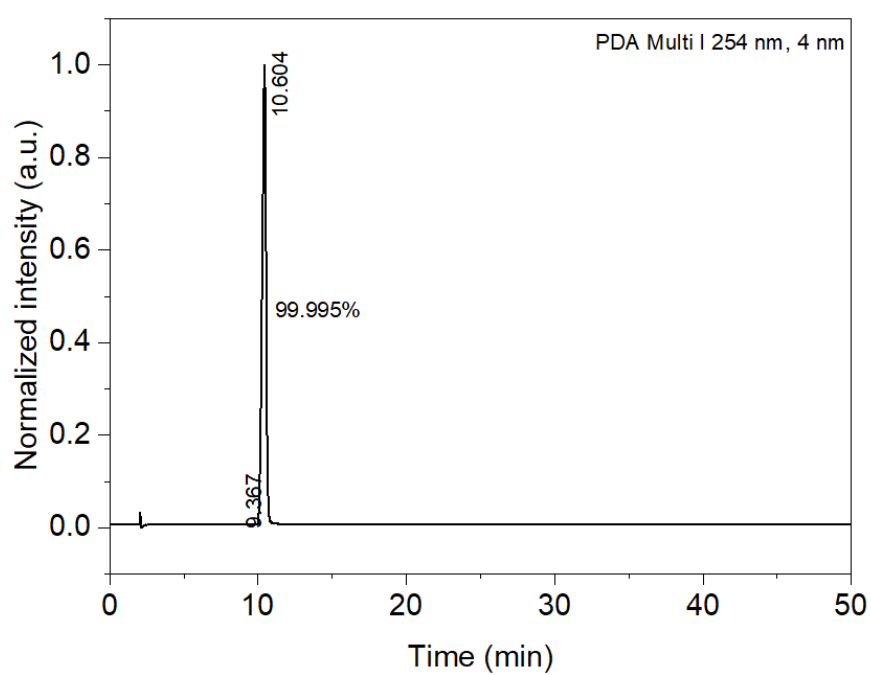

**Supplementary Fig. 12** High performance liquid chromatography (HPLC) spectrum of BD-Cz-2CzO after 240 hours of continuous heating at 360 °C.

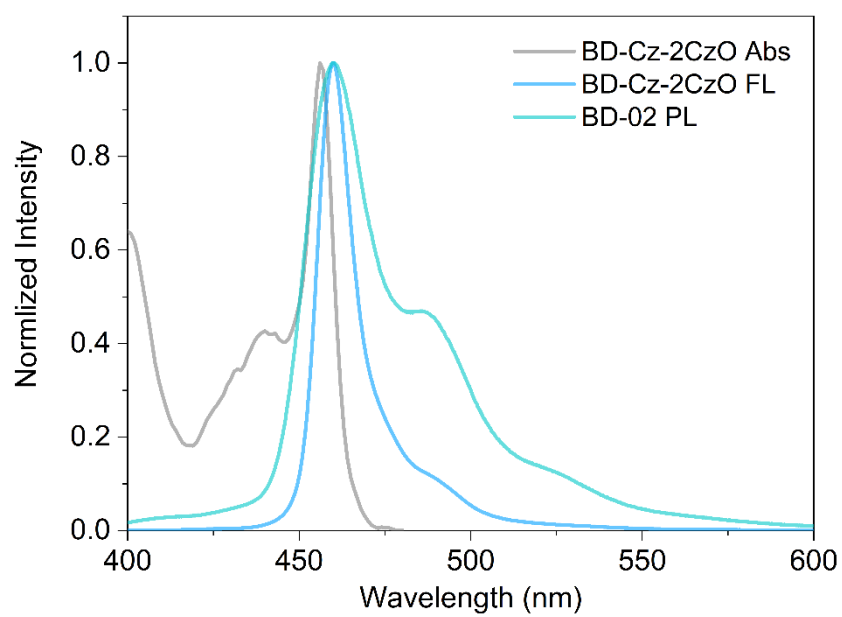

**Supplementary Fig. 13** UV-vis absorption, emission spectra of BD-Cz-2CzO, and emission spectra of BD-02 in dilute toluene solution.

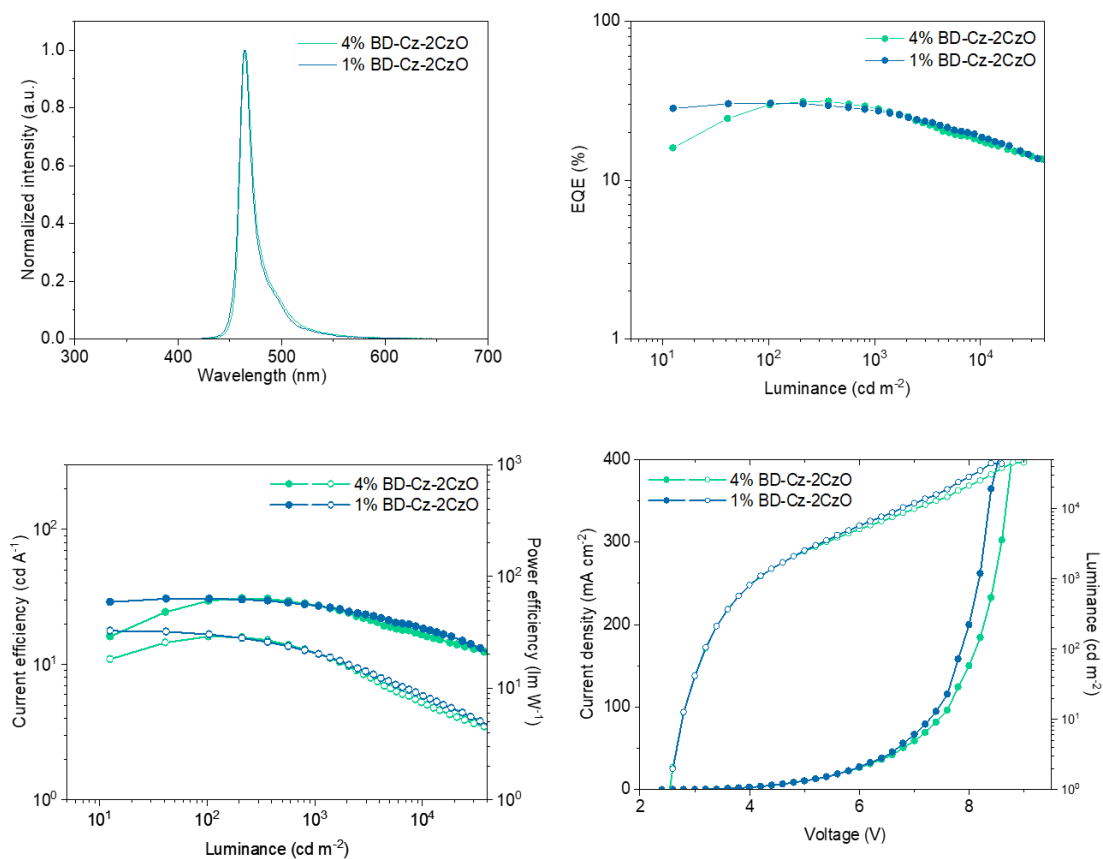

**Supplementary Fig. 14** EL characteristics of devices based on BD-Cz-2CzO : EL spectra (recorded at  $1000 \text{ cd m}^{-2}$ ) (a), external quantum efficiency -luminance (EQE-L) curves (b), Current and power efficiency-luminance (CE-L-PE) curves (c), and Current density-luminance-voltage (J-V-L) (d) at different doping ratios.

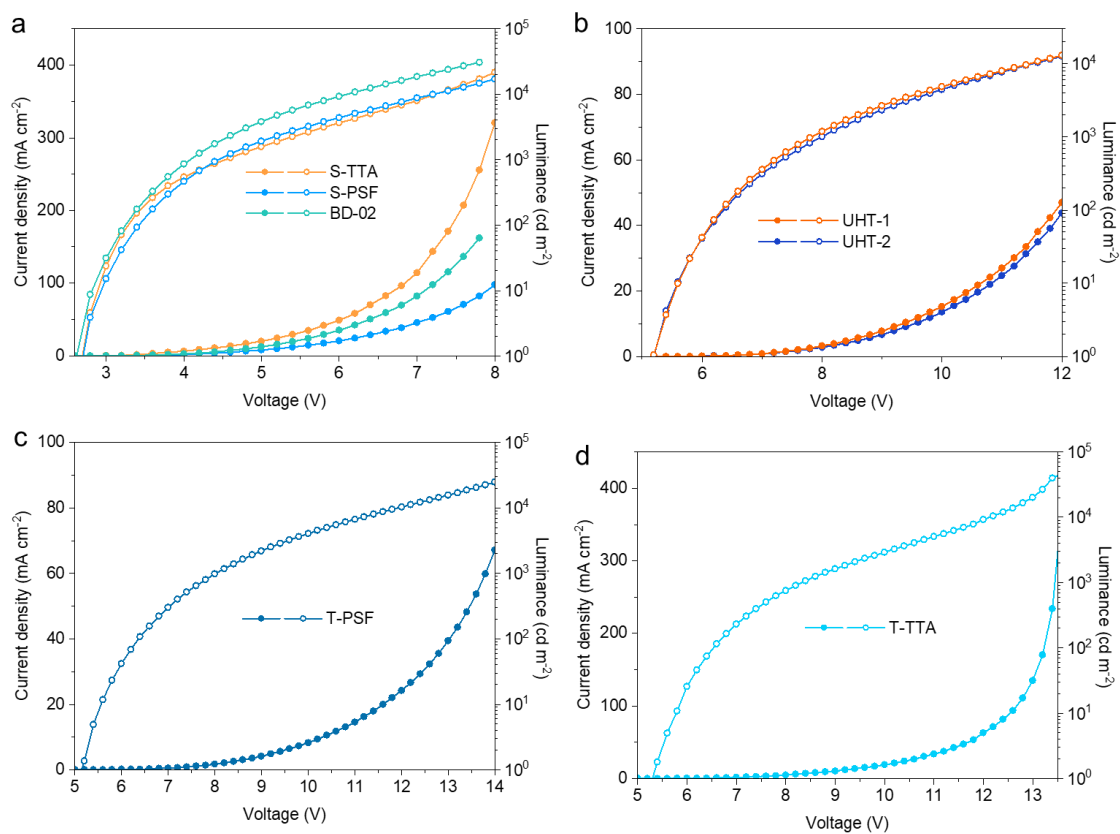

**Supplementary Fig. 15** J-V-L characteristics of the single and tandem devices based on BD-Cz-2CzO. (a) J-V-L curves of S-TTA, S-PSF devices and reference device based on BD-02. (b) J-V-L curves of UHT-1 and UHT-2 devices. (c) J-V-L curves of T-PSF device. (d) J-V-L curves of T- TTA device.



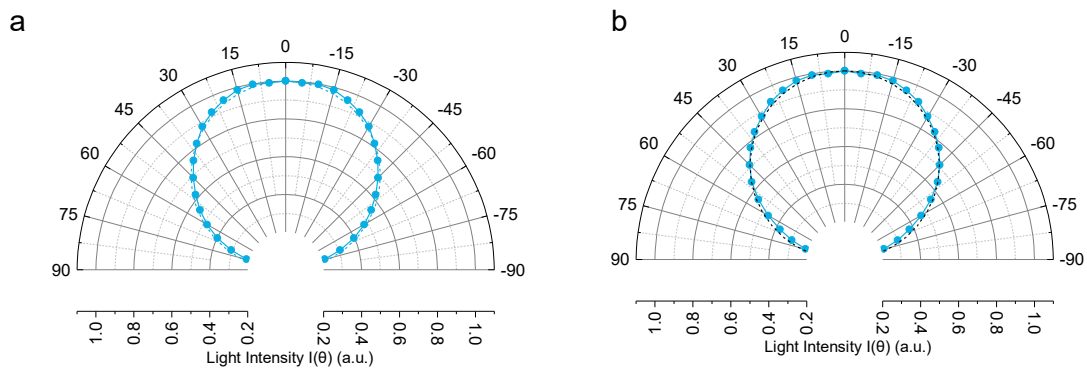

**Supplementary Fig. 16** Angle-dependent EL intensities of (a) UHT-1 and (b) UHT-2 devices, compared to the Lambertian distribution.

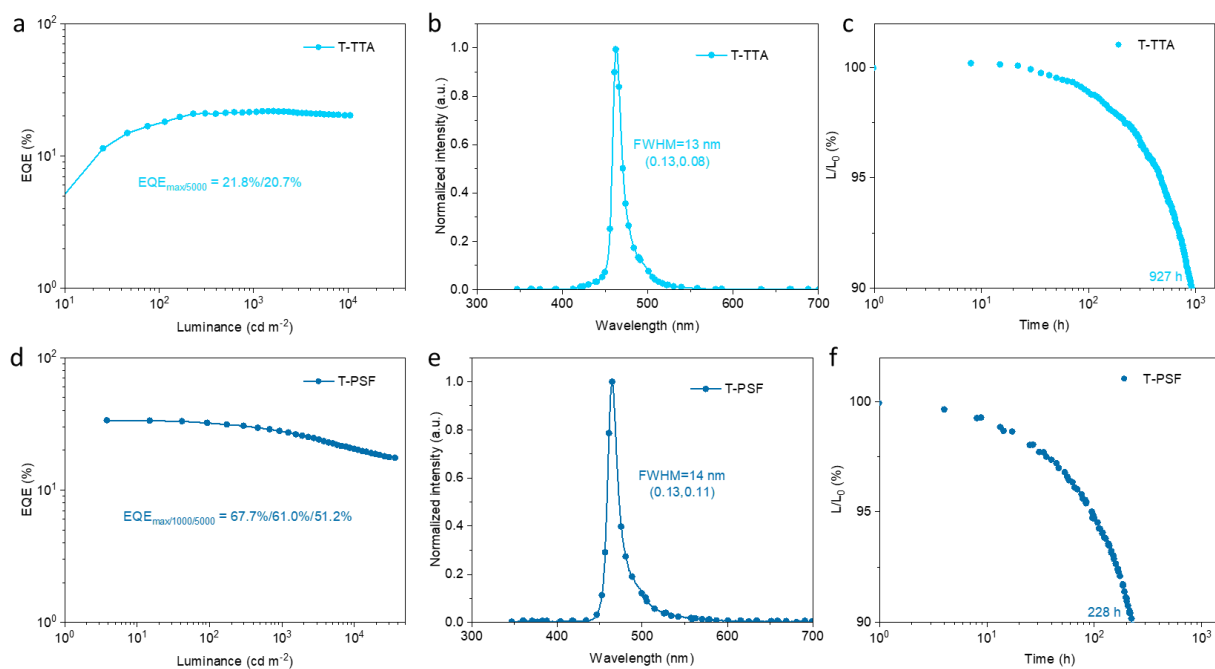

**Supplementary Fig. 17** EL performance of the dual-unit tandem device with two TTA units (T-TTA) and two PSF units (T-PSF). (a,d) EQE-L curve. (b,e) EL spectra. (c,f) The operation lifetime of the devices at an initial luminance of  $1,000 \text{ cd m}^{-2}$ .

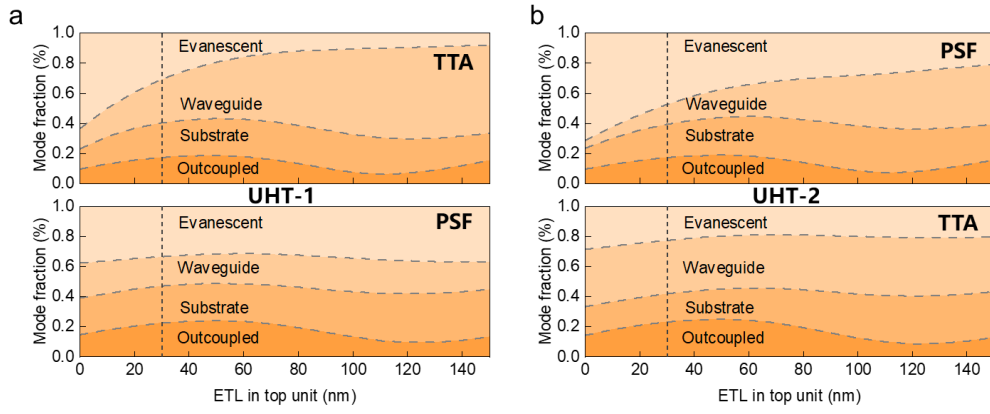

**Supplementary Fig. 18** Optical simulation results of hybrid tandem OLED devices. Optical simulation results of the distribution of various optical modes of UHT-1 (a) and UHT-2(b).

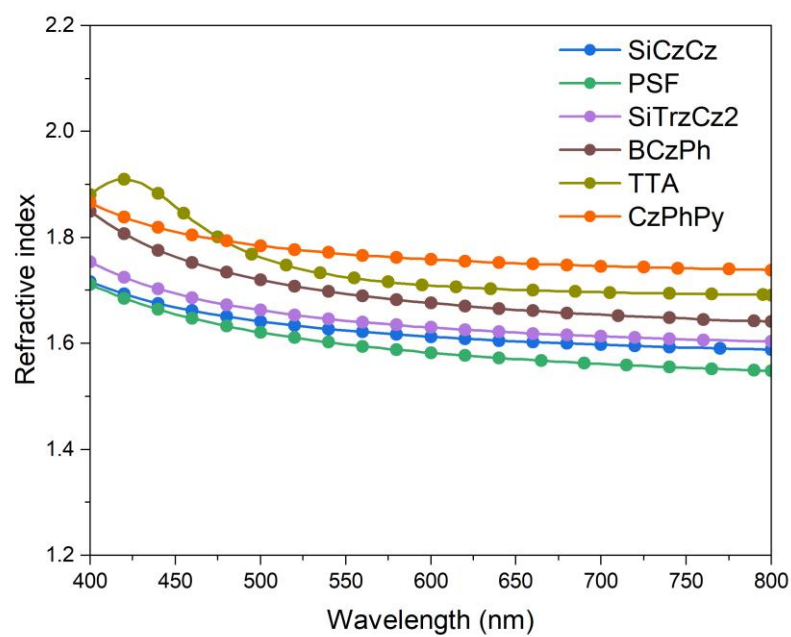

**Supplementary Fig. 19** Refractive indexes of the charge blocking layers and EMLs in PSF-unit and TTA-unit.

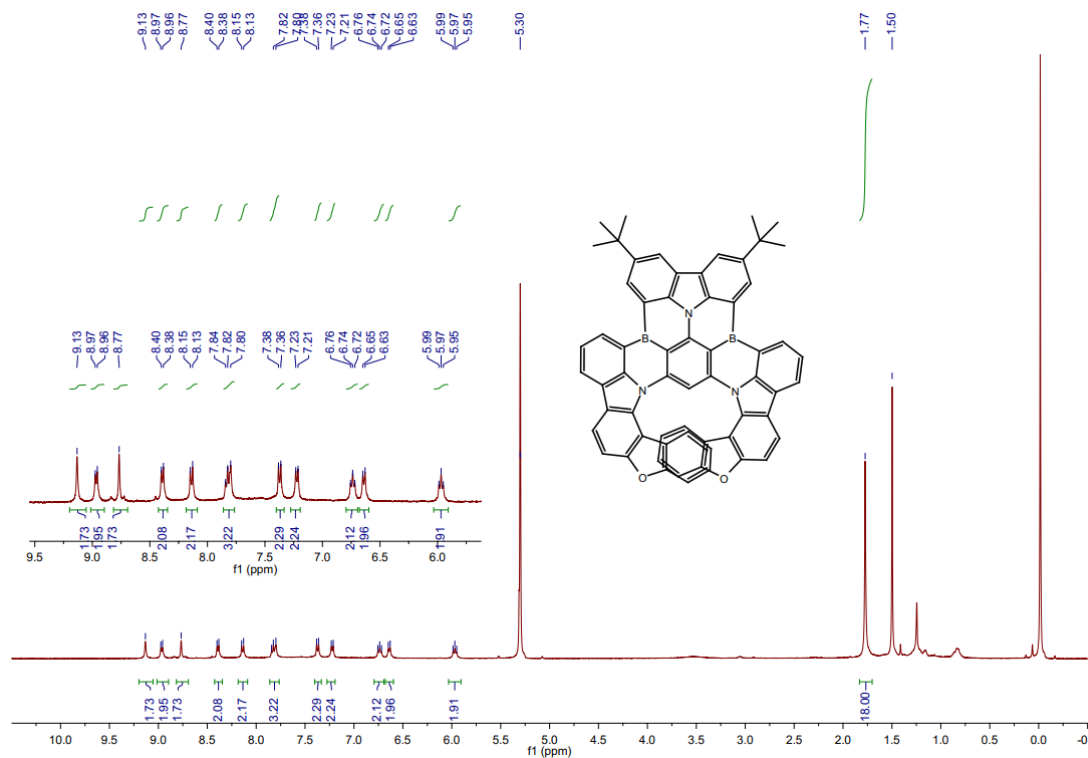

**Supplementary Fig. 19** <sup>1</sup>H NMR spectrum of BD-Cz-2CzO in CD<sub>2</sub>Cl<sub>2</sub>.

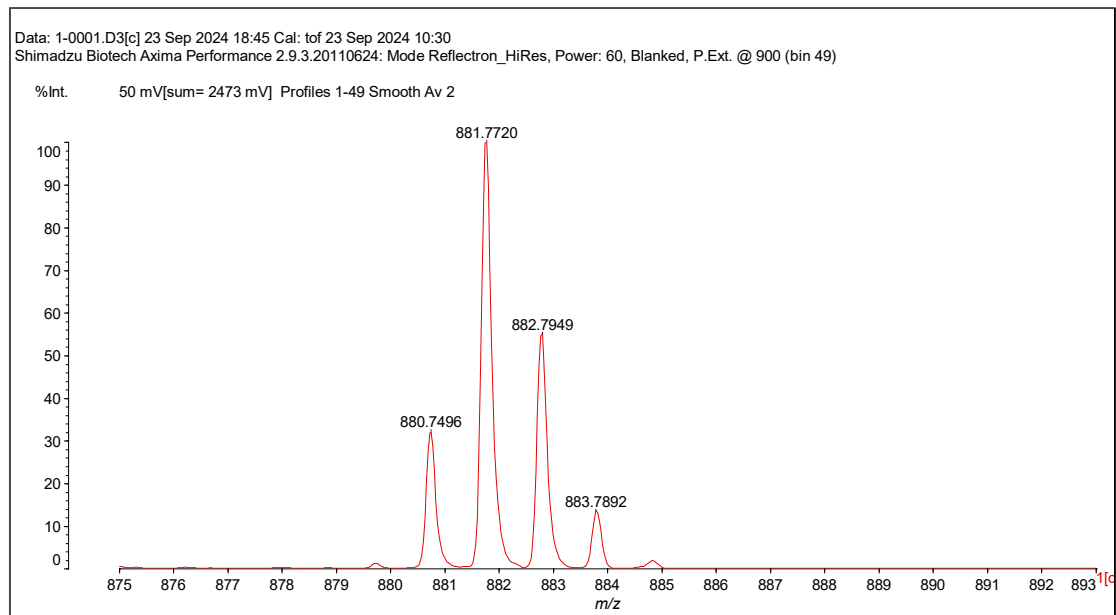

**Supplementary Fig. 20** MALDI-TOF mass spectrum of BD-Cz-2CzO.

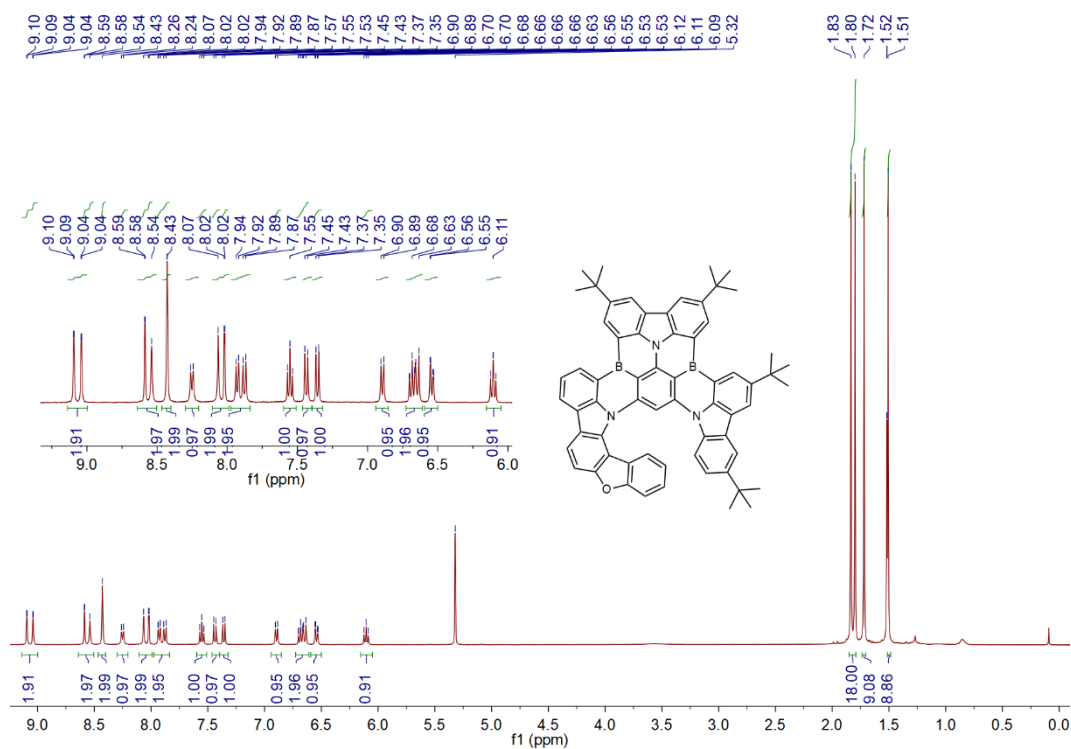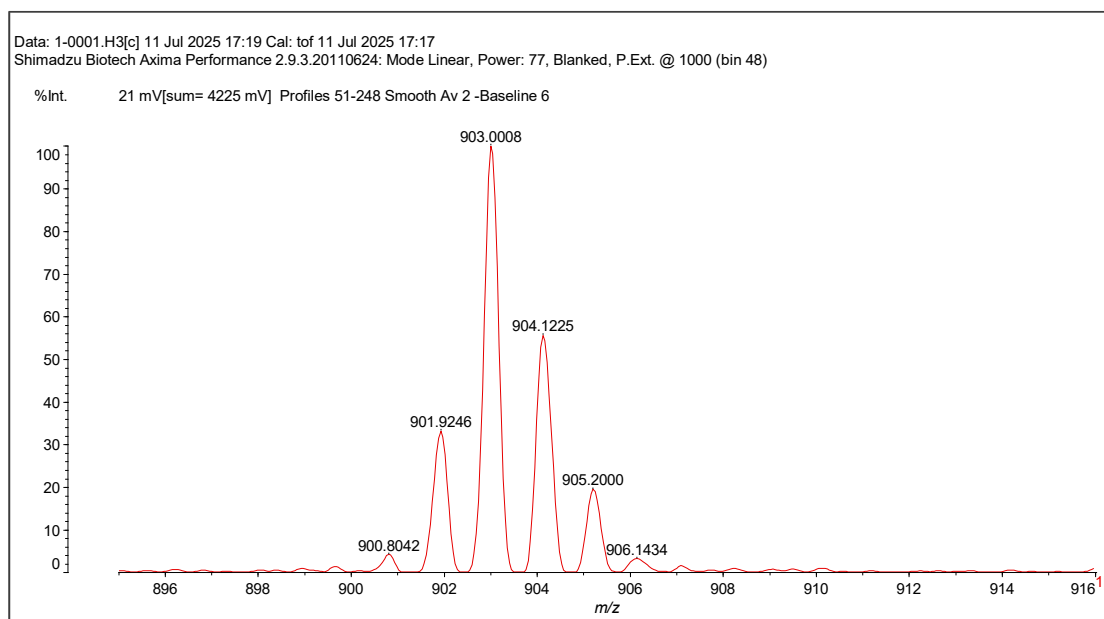

**Supplementary Table 1.** Summary of OLED performance employing deep-blue MR-TADF emitter .

| Emitter      | $\lambda_{\text{PL}}$<br>(nm) | FWHM <sub>PL</sub><br>(nm) | $\lambda_{\text{EL}}$<br>(nm) | FWHM <sub>EL</sub><br>(nm) | EQE <sub>max</sub><br>(%) | CIE<br>(x, y)  | Ref.                                         |
|--------------|-------------------------------|----------------------------|-------------------------------|----------------------------|---------------------------|----------------|----------------------------------------------|
| BD-Cz-2CzO   | 460                           | 12                         | 464                           | 14                         | 33.5                      | (0.13, 0.11)   | This work                                    |
| BD-2Cz-CzO   | 466                           | 14                         | 466                           | 18                         | 31.3                      | (0.13, 0.12)   | This work                                    |
| [B-N]N2      | 438                           | 16                         | 441                           | 20                         | 20.3                      | (0.152, 0.046) | Adv. Mater.<br>2024, 36,<br>2409706.         |
| v-DABNA      | 468                           | 14                         | 469                           | 18                         | 34.4                      | (0.12,0.11)    | Nat. Photon.<br>2019, 13,<br>678–682         |
| BOBO-Z       | 441                           | 15                         | 445                           | 18                         | 13.6                      | (0.15,0.04)    | Adv. Mater.<br>2022, 34,<br>2107951          |
| V-DABNA-F    | 467                           | 13                         | 468                           | 15                         | 26.6                      | (0.12,0.10)    | Adv. Sci.<br>2023, 10,<br>2205070            |
| DOBN         | 438                           | 19                         | 449                           | 20                         | 35.4                      | (0.15, 0.04)   | ACS Mater.<br>Lett.<br>2024, 6,<br>3246–3253 |
| m-v-DABNA    | 464                           | 14                         | 471                           | 18                         | 36.2                      | (0.12, 0.12)   | Chem. Eng.<br>J. 2022, 432<br>134381         |
| 4F-v-DABNA   | 457                           | 14                         | 464                           | 18                         | 35.8                      | (0.13,0.08)    | Chem. Eng.<br>J. 2022, 432<br>134381         |
| 4F-m-v-DABNA | 455                           | 14                         | 461                           | 18                         | 33.7                      | (0.13,0.06)    | Chem. Eng.<br>J. 2022, 432<br>134381         |
| DBCz-Mes     | 452                           | 14                         | 452                           | 17                         | 33.9                      | (0.14, 0.06)   | Sci. Adv.<br>2023, 9,<br>eadh1434            |
| DPA-B3       | 448                           | 14                         | 450                           | 15                         | 37.7                      | (0.15, 0.04)   | Nat.<br>Photon.<br>2024, 18,<br>1161–1169    |
| DPA-B4       | 458                           | 12                         | 457                           | 14                         | 39.2                      | (0.14, 0.05)   | Nat.<br>Photon.<br>2024, 18,<br>1161–1169    |
| v-DABNA-Az1  | 453                           | 14                         | 459                           | 19                         | 30.8                      | (0.14, 0.08)   | Adv. Mater.<br>2024, 36,<br>2402905          |
| v-DABNA-Az2  | -                             | -                          | 458                           | 17                         | 29.9                      | (0.14, 0.06)   | Adv. Mater.<br>2024, 36,<br>2402905          |

|                      |     |    |     |    |      |              |                                                         |
|----------------------|-----|----|-----|----|------|--------------|---------------------------------------------------------|
| v-DABNA-Az3          | -   | -  | 459 | 20 | 33   | (0.14, 0.10) | Adv. Mater.<br>2024, 36,<br>2402905                     |
| tBisICz-PhCz         | 440 | 16 | 446 | 19 | 24.9 | (0.16, 0.04) | Adv. Sci.<br>2023, 10,<br>2302619                       |
| Cz-DICz              | 457 | 14 | 460 | 18 | 25.6 | (0.14,0.10)  | Adv. Sci.<br>2023, 10,<br>2302619                       |
| tBO-4B               | 449 | 13 | 452 | 16 | 30.3 | (0.16, 0.04) | Adv. Mater.<br>2025, 37,<br>2500010.                    |
| pNAICZ-tPh           | 456 | 15 | 458 | 19 | 34.3 | (0.15, 0.11) | Adv. Mater.<br>2025, 37,<br>2503839.                    |
| BN3                  | 456 | 17 | 456 | 18 | 38.9 | (0.14, 0.06) | Adv. Mater.<br>2025, 37,<br>2502459.                    |
| DBDS                 | 452 | 16 | 456 | 18 | 39.6 | (0.14, 0.06) | Adv. Mater.<br>2025, 37,<br>2502459.                    |
| DBDSe                | 453 | 17 | 456 | 18 | 40.5 | (0.14, 0.06) | Adv. Mater.<br>2025, 37,<br>2502459.                    |
| 3B-DPA               | 437 | 13 | 438 | 15 | 29.3 | (0.15, 0.03) | Angew.<br>Chem. Int.<br>Ed.<br>2025, 64,<br>e202503320. |
| Cz-DABNA             | 465 | 12 | 472 | 16 | 23.8 | (0.14, 0.19) | Angew.<br>Chem. Int.<br>Ed.<br>2023, 62,<br>e202313084. |
| <i>t</i> -BuCz-DABNA | 466 | 12 | 472 | 16 | 29.2 | (0.14, 0.19) | Angew.<br>Chem. Int.<br>Ed.<br>2023, 62,<br>e202313084. |



**Supplementary Table 2.** X-ray crystallographic data of BD-Cz-2CzO.

|                                           |                                                                              |                       |                                                     |
|-------------------------------------------|------------------------------------------------------------------------------|-----------------------|-----------------------------------------------------|
| Temperature/K                             | 193                                                                          | Crystal system        | monoclinic                                          |
| Empirical formula                         | C <sub>62</sub> H <sub>41</sub> B <sub>2</sub> N <sub>3</sub> O <sub>2</sub> | Formula weight        | 881.6                                               |
| Space group                               | P2/c                                                                         | Wavelength/ Å         | 1.34139                                             |
| a/Å                                       | 10.7345(13)                                                                  | $\alpha/^\circ$       | 90                                                  |
| b/Å                                       | 13.9793(16)                                                                  | $\beta/^\circ$        | 96.923(5)                                           |
| c/Å                                       | 32.376(4)                                                                    | $\gamma/^\circ$       | 90                                                  |
| V/Å <sup>3</sup>                          | 4823.0(10)                                                                   | Z                     | 4                                                   |
| Dx/g cm <sup>-3</sup>                     | 1.214                                                                        | $\mu/\text{mm}^{-1}$  | 0.360                                               |
| F(000)                                    | 1840.0                                                                       | Reflections collected | 22102                                               |
| Independent reflections                   | 8777                                                                         | R(int)                | 0.1261                                              |
| Data/restraints/parameters                | 8777/0/629                                                                   | GOF on F <sup>2</sup> | 1.011                                               |
| Final R indexes [I $\geq$ 2 $\sigma$ (I)] | R <sub>1</sub> = 0.0755<br>wR <sub>2</sub> = 0.1879                          | R indexes (all data)  | R <sub>1</sub> = 0.1572<br>wR <sub>2</sub> = 0.2300 |

**Supplementary Table 3.** X-ray crystallographic data of BD-2Cz-CzO.

|                                           |                                                                 |                         |                                                     |
|-------------------------------------------|-----------------------------------------------------------------|-------------------------|-----------------------------------------------------|
| Temperature/K                             | 193                                                             | Crystal system          | monoclinic                                          |
| Empirical formula                         | C <sub>64</sub> H <sub>55</sub> B <sub>2</sub> N <sub>3</sub> O | Formula weight          | 903.7                                               |
| Space group                               | C2/c                                                            | Wavelength/ Å           | 1.54178                                             |
| a/Å                                       | 36.624(2)                                                       | $\alpha$ /°             | 90                                                  |
| b/Å                                       | 16.4197(10)                                                     | $\beta$ /°              | 124.187(3)                                          |
| c/Å                                       | 22.1087(15)                                                     | $\gamma$ /°             | 90                                                  |
| V/Å <sup>3</sup>                          | 10997.9(13)                                                     | Z                       | 8                                                   |
| Dx/g cm <sup>-3</sup>                     | 1.092                                                           | $\mu$ /mm <sup>-1</sup> | 0.487                                               |
| F (000)                                   | 3824.0                                                          | Reflections collected   | 54488                                               |
| Independent reflections                   | 10118                                                           | R(int)                  | 0.0876                                              |
| Data/restraints/parameters                | 8777/0/629                                                      | GOF on F <sup>2</sup>   | 1.111                                               |
| Final R indexes [I $\geq$ 2 $\sigma$ (I)] | R <sub>1</sub> = 0.0991<br>wR <sub>2</sub> = 0.2804             | R indexes (all data)    | R <sub>1</sub> = 0.1311<br>wR <sub>2</sub> = 0.3200 |

**Supplementary Table 4** Summary of the photophysical properties of BD-3Cz, BD-2Cz-CzO, and BD-Cz-2CzO doped films.

| Emitter        | $\lambda_{em}^a$<br>(nm) | FWHM<br>(nm) | $\Phi_{PL}^b$<br>(%) | $\tau_p^c$<br>(ns) | $\tau_d^c$<br>( $\mu$ s) | $k_r^d$<br>( $\times 10^8 s^{-1}$ ) | $k_{RISC}^e$<br>( $\times 10^4 s^{-1}$ ) |
|----------------|--------------------------|--------------|----------------------|--------------------|--------------------------|-------------------------------------|------------------------------------------|
| BD-3Cz         | 471                      | 24           | 93                   | 12                 | 45                       | 0.64                                | 2.0                                      |
| BD-2Cz-<br>CzO | 468                      | 18           | 96                   | 9                  | 47                       | 0.86                                | 2.2                                      |
| BD-Cz-<br>2CzO | 466                      | 14           | 98                   | 9                  | 52                       | 0.84                                | 2.3                                      |

<sup>a</sup> Maximum emission peak <sup>b</sup> Absolute PL quantum yield evaluated using an integration sphere. <sup>c</sup> Emission lifetime of prompt fluorescence ( $\tau_p$ ) and delayed fluorescence ( $\tau_d$ ). <sup>d</sup> Rate constant of fluorescence radiative decay ( $S_1-S_0$ ). <sup>e</sup> Rate constant of RISC ( $T_1-S_1$ ).

**Supplementary Table 5.** Summary of the single-unit PSF devices based on BD-Cz-2CzO performances.

| <b>x<br/>wt%</b> | <b><math>\lambda_{EL}^a</math><br/>(nm)</b> | <b>FWHM<br/>(nm)</b> | <b><math>EQE_{max/1000/5000}^b</math><br/>(%)</b> | <b><math>PE_{max/1000/5000}^c</math><br/>(lm W<sup>-1</sup>)</b> | <b><math>CE_{max/1000/5000}^d</math><br/>(cd A<sup>-1</sup>)</b> | <b>CIE<sup>e</sup><br/>(x,y)</b> |
|------------------|---------------------------------------------|----------------------|---------------------------------------------------|------------------------------------------------------------------|------------------------------------------------------------------|----------------------------------|
| 1%               | 464                                         | 14                   | 30.3/27.1/21.4                                    | 32.5/20.3/11.5                                                   | 30.7/27.1/21.3                                                   | (0.13,0.11)                      |
| 2%               | 464                                         | 14                   | 33.5/27.9/22.5                                    | 33.2/18.4/10.4                                                   | 31.7/25.8/20.6                                                   | (0.13,0.11)                      |
| 4%               | 464                                         | 14                   | 31.3/28.0/19.9                                    | 29.0/20.3/9.9                                                    | 30.8/27.1/18.9                                                   | (0.13,0.11)                      |

<sup>a</sup> EL peak wavelength. <sup>b</sup> Maximum external quantum efficiency (EQE) and EQE at 1000 and 5000 cd m<sup>-2</sup>. <sup>c</sup> Maximum power efficiency (PE) and PE at 1000 and 5000 cd m<sup>-2</sup>. <sup>d</sup> Maximum current efficiency (CE) and CE at 1000 and 5000 cd m<sup>-2</sup>. <sup>e</sup> CIE coordinates.

**Supplementary Table 6.** Summary of recent reported the-state-of-art stable bottom-emitting blue OLEDs with  $\lambda_{\text{EL}} \leq 467$  nm.

| Device                  | $\lambda_{\text{EL}}$<br>(nm) | FWHM<br>(nm) | EQE <sub>max/1000</sub> (%) | LT90 (h) | CIE <sub>y</sub> | Ref.                                             |
|-------------------------|-------------------------------|--------------|-----------------------------|----------|------------------|--------------------------------------------------|
| S-PSF                   | 464                           | 14           | 33.5/27.9                   | 150      | 0.11             | This work                                        |
| UHT1                    | 464                           | 14           | 46.3/42.4                   | 263      | 0.11             | This work                                        |
| UHT2                    | 464                           | 14           | 39.7/37.2                   | 539      | 0.10             | This work                                        |
| p4TCzPhBN               | 461                           | 29           | 32.5/~25                    | 25       | 0.12             | Adv. Mater.<br>2020, 32, 1908355                 |
| BD-02                   | 462                           | 43           | 25.4/23.4                   | 350      | 0.20             | Nat. Photon.<br>2022, 16, 212–218                |
| BD-02 (PSF)             | ~463                          | ~37          | ~29/25.8                    | ~200     | 0.165            | Sci. Adv.<br>2022, 8, eabq1641                   |
| BD-02<br>(Tandem)       | 461                           | 24           | 36.8/-                      | 238      | 0.12             | Nat. Photon.<br>2025,19, 607–614                 |
| Pt-SPCz                 | ~460                          | 22           | 25.1/21.1                   | 60       | 0.13             | Adv. Mater.<br>2024, 36, 2409394                 |
| Pt-SPCz (PSF)           | 460                           | 26           | 28.1/25.3                   | 40       | 0.096            | Adv. Mater.<br>2024, 36, 2409394                 |
| Pt-SPCz<br>(Tandem)     | 460                           | 26           | 50.3/44.4                   | 180      | 0.14             | Adv. Mater.<br>2024, 36, 2409394                 |
| <b>v</b> -DABNA-<br>Az1 | 459                           | 19           | 30.8/19.9                   | 0.45     | 0.083            | Adv. Mater.<br>2024, 36, 2402905                 |
| <b>v</b> -DABNA-<br>Az2 | 458                           | 17           | 29.9/16                     | 0.53     | 0.06             | Adv. Mater. 2024, 36,<br>2402905                 |
| <b>v</b> -DABNA-<br>Az3 | 459                           | 20           | 33.0/22.4                   | 1.07     | 0.10             | Adv. Mater. 2024, 36,<br>2402905                 |
| Ir(cb)3                 | 462                           | -            | 14.4/-                      | 31       | 0.17             | Chem. Eng. J. 2022,<br>448, 137671               |
| Pt-AdaPh                | ~461                          | -            | 22.6/-                      | 0.05     | 0.12             | Adv. Funct. Mater.<br>2021, 31, 2100967          |
| Pt-dipCz                | 461                           | 22           | 25/22.8                     | >20      | 0.16             | Small Methods 2024, 8,<br>2301710                |
| 3B-DPA<br>(HF)          | 438                           | 15           | 29.3/-                      | ~0.5 h   | 0.06             | Angew. Chem. Int.<br>Ed. 2025, 64,<br>e202503320 |
| pNAICZ-tPh<br>(TSF)     | 458                           | 19           | 34.3/26.9                   | 40       | 0.11             | Adv. Mater.<br>2025, 37, 2503839                 |

|                  |     |    |           |      |      |                                                              |
|------------------|-----|----|-----------|------|------|--------------------------------------------------------------|
| 5Cz-BNO<br>(TSF) | 462 | 31 | 36.3/21.4 | ~90  | 0.11 | Angew. Chem. Int.<br>Ed. 2025, 64,<br>e202420489             |
| PtON5-dtb        | 464 | 34 | 19.3/17.3 | 48   | 0.16 | Adv. Funct. Mater.<br>2024, 34, 2405066                      |
| PtQS1            | 464 | 17 | 28.0/26.6 | ~20  | 0.11 | Nat. Photon. 2025.<br>doi.org/10.1038/s41566-<br>025-01706-0 |
| PtR2             | 466 | 22 | 29.2/27.3 | ~25  | 0.15 | Nat. Photon. 2025.<br>doi.org/10.1038/s41566-<br>025-01706-0 |
| Pt-Me-imp        | 466 | 27 | 22.8/20.3 | ~400 | 0.18 | Adv. Mater. 2025.<br>e10070.                                 |

**Supplementary Table 7.** Summarized EL performance of tandem TTA and PSF devices based on BD-Cz-2CzO

| Device | $\lambda_{\text{EL}}$<br>(nm) | FWHM<br>(nm) | $\text{EQE}_{\text{max}}/5000/10000$<br>(%) | $\text{PE}_{\text{max}}/5000/10000$<br>(lm W <sup>-1</sup> ) | $\text{CE}_{\text{max}}/5000/10000$<br>(cd A <sup>-1</sup> ) | CIE (x,y)   | LT90<br>(h) |
|--------|-------------------------------|--------------|---------------------------------------------|--------------------------------------------------------------|--------------------------------------------------------------|-------------|-------------|
| T-PSF  | 464                           | 14           | 67.7/61.0/51.2                              | 35.2/22.7/14.5                                               | 65.1/57.7/47.8                                               | (0.13,0.11) | 228         |
| T-TTA  | 463                           | 13           | 21.8/20.7/20.2                              | 6.8/4.3/3.8                                                  | 15.7/15.0/14.7                                               | (0.13,0.08) | 927         |

<sup>a</sup> EL peak wavelength. <sup>b</sup> Maximum external quantum efficiency (EQE) and EQE at 5000 and 10000 cd m<sup>-2</sup>. <sup>c</sup> Maximum power efficiency (PE) and PE at 5000 and 10000 cd m<sup>-2</sup>. <sup>d</sup> Maximum current efficiency (CE) and CE at 5000 and 10000 cd m<sup>-2</sup>. <sup>e</sup> CIE coordinates. <sup>f</sup> Recorded at an initial luminance of 1,000 cd m<sup>-2</sup>.

## References

- 1 Lukosz, W. Theory of optical-environment-dependent spontaneous-emission rates for emitters in thin layers. *Phys. Rev. B* **22**, 3030-3038 (1980).
- 2 Wasey, J. & Barnes, W. Efficiency of spontaneous emission from planar microcavities. *Journal of Modern Optics* **47**, 725-741 (2000).
- 3 Neyts, K. A. Simulation of light emission from thin-film microcavities. *J. Opt. Soc. Am. A* **15**, 962-971 (1998).
- 4 Furno, M., Meerheim, R., Hofmann, S., Lüssem, B. & Leo, K. Efficiency and rate of spontaneous emission in organic electroluminescent devices. *Phys. Rev. B* **85**, 115205 (2012).
- 5 Kim, J., Kang, K., Kim, K.-Y. & Kim, J. Origin of a sharp spectral peak near the critical angle in the spectral power density profile of top-emitting organic light-emitting diodes. *Jpn. J. Appl. Phys.* **57**, 012101 (2018).
- 6 Kang, K., Kim, K.-Y. & Kim, J. Theoretical comparison of the excitation efficiency of waveguide and surface plasmon modes between quantum-mechanical and electromagnetic optical models of organic light-emitting diodes. *Opt. Express* **26**, A955-A973 (2018).
- 7 Kim, J. & Kim, J. Theoretical Modeling and Analysis of the Contribution of the Near-Field Absorption to the Dipole Radiation Power in Top-Emitting Organic Light-Emitting Diodes. *Appl. Sci.* **11**, 3181 (2021).
- 8 Byrnes, S. Multilayer optical calculations. (2016). DOI: 10.48550/arXiv.1603.02720.
